# Supplementary material for: Triple-stimuli-responsive ferrocene-containing homopolymers by RAFT polymerization
Source: Royal Society of Chemistry journal article supplement (doi:10.1039/c7py00091j), 2017-01-01
Supplement: c7py00091j1.pdf [file c7py00091j1.pdf]

## Supporting Information for

# Triple-Stimuli-Responsive Ferrocene-Containing Homopolymer by RAFT Polymerization

Xue Jiang,<sup>1,#</sup> Ruru Li,<sup>1,2,#</sup> Chun Feng,<sup>1,\*</sup> Guolin Lu,<sup>1</sup> Xiaoyu Huang<sup>1,2,\*</sup>

<sup>1</sup> Key Laboratory of Synthetic and Self-Assembly Chemistry for Organic Functional Molecules, Shanghai Institute of Organic Chemistry, Chinese Academy of Sciences, 345 Lingling Road, Shanghai 200032, People's Republic of China

<sup>2</sup> School of Physical Science & Technology, ShanghaiTech University, 100 Haike Road, Shanghai 201210, People's Republic of China

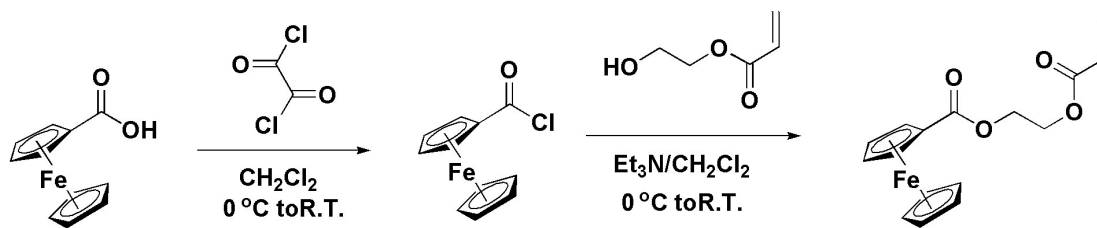

**Scheme S1.** Synthetic route of 2-acryloxyethyl ferrocenecarboxylate (AEFC).

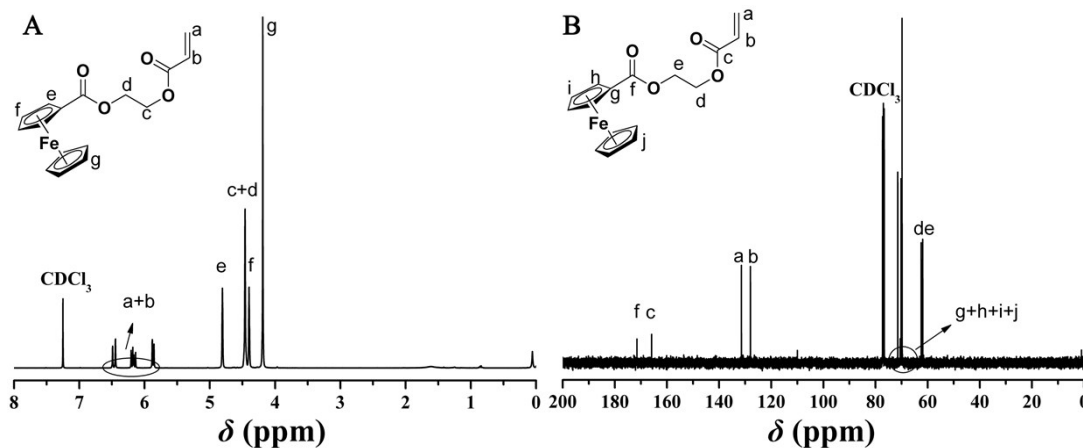

**Figure S1.** <sup>1</sup>H (A) and <sup>13</sup>C (B) NMR spectra of 2-acryloxyethyl ferrocenecarboxylate in CDCl<sub>3</sub>.

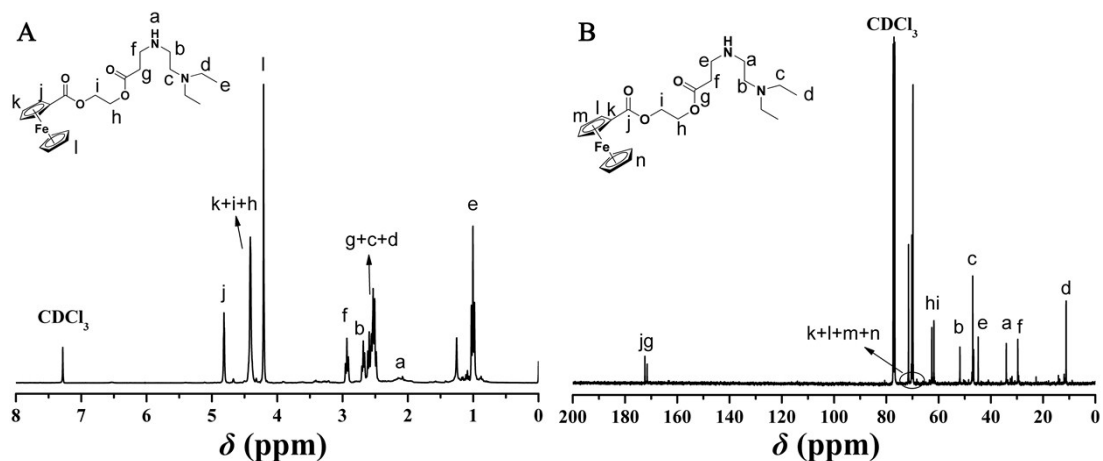

**Figure S2.**  $^1\text{H}$  (A) and  $^{13}\text{C}$  (B) NMR spectra of 2-(3-(2-(diethylamino)ethylamino)propanoyloxy)ethyl ferrocenecarboxylate in  $\text{CDCl}_3$ .

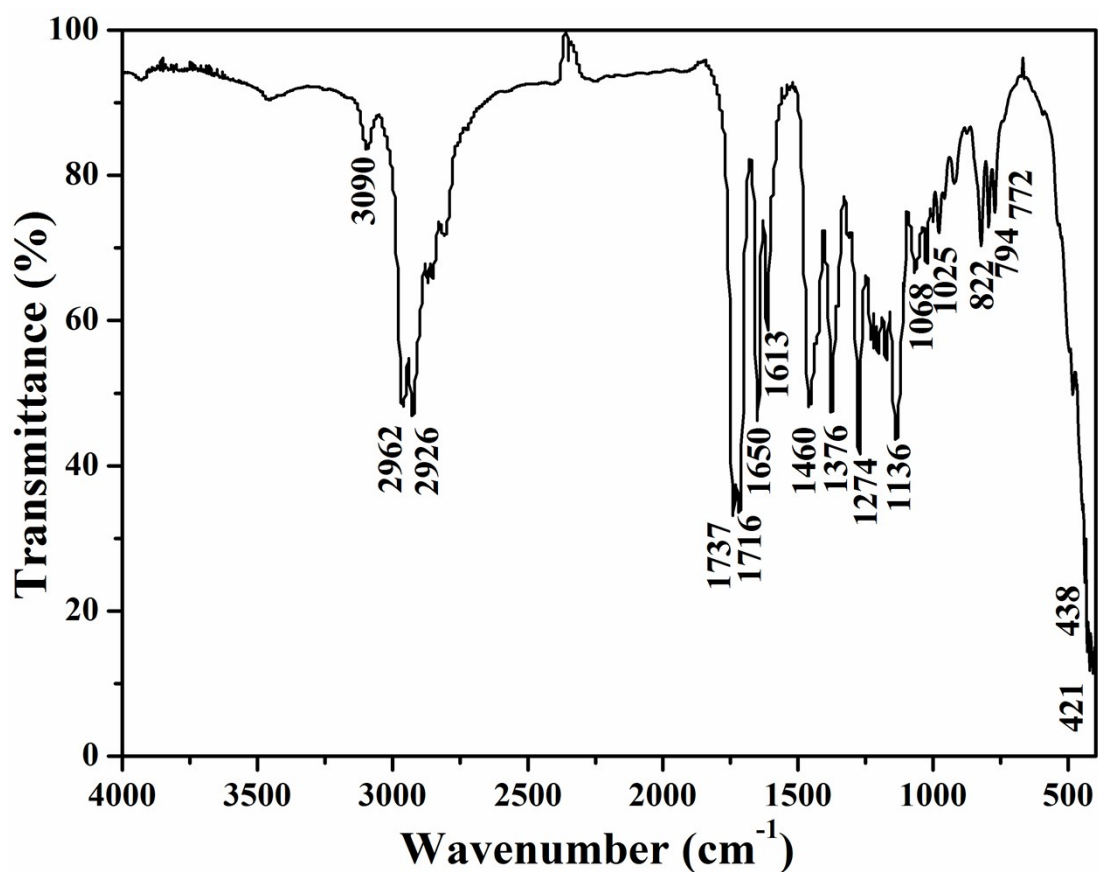

**Figure S3.** FT-IR spectrum of Fc-DEAE-AM 3 monomer.

Print of window 80: MS Spectrum

Injection Date : 12/5/2014 6:10:44 PM Seq. Line : 45  
Sample Name : JX-6-49-P Location : P2-D-02  
Acq. Operator : Agilent LC/MSD SL@SMSC, SIOC Inj : 1  
Inj Volume : 0.1  $\mu$ l  
Acq. Method : C:\HPCHEM\METHODS\ANAL1.M  
Last changed : 12/5/2014 4:25:56 PM by Agilent LC/MSD SL@SMSC, SIOC  
Analysis Method : C:\HPCHEM\METHODS\AGILENT1.M  
Last changed : 12/5/2014 6:41:22 PM by Agilent LC/MSD SL@SMSC, SIOC  
(modified after loading)

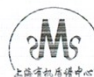

Test

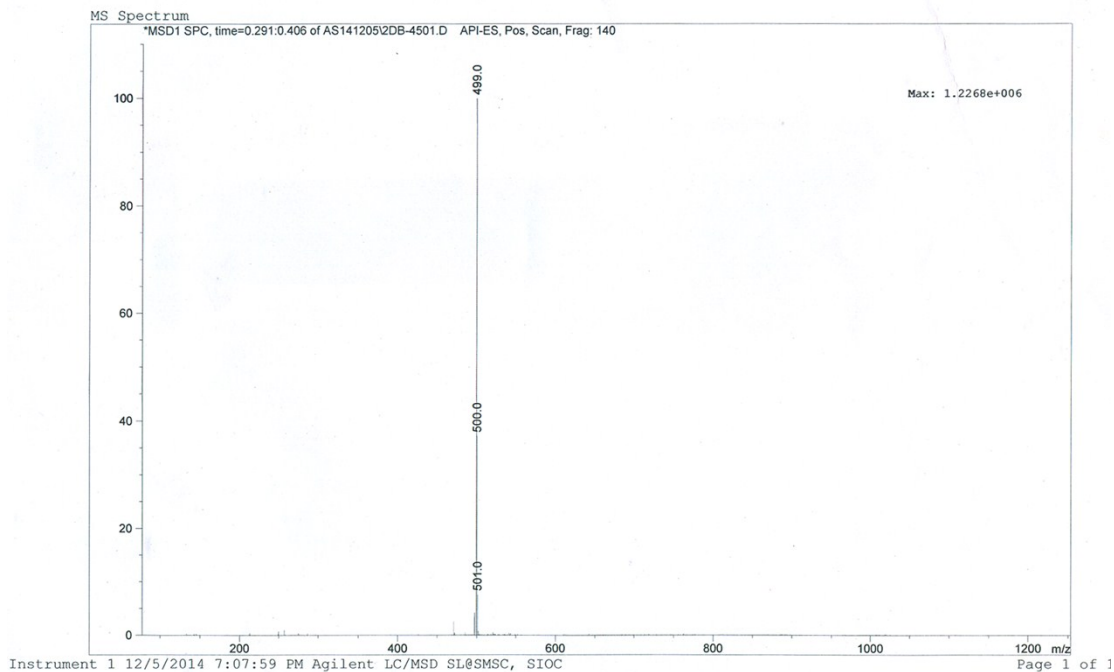

**Figure S4.** ESI-MS spectrum of Fc-DEAE-AM 3 monomer.

National Center for Organic Mass Spectrometry in Shanghai  
Shanghai Institute of Organic Chemistry  
Chinese Academic of Sciences  
High Resolution MS DATA REPORT

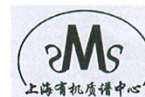

Instrument: Thermo Fisher Scientific LTQ FT Ultra

Card Serial Number : M140928

Sample Serial Number: JX-6-49-P

Operator : HUAQIN Date: 2014/12/09

Operation Mode: DART Postive

Elemental composition search on mass 497.19

m/z= 492.19-502.19

| m/z      | Theo. Mass | Delta (ppm) | RDB equiv. | Composition                                                                    |
|----------|------------|-------------|------------|--------------------------------------------------------------------------------|
| 497.1930 | 497.1929   | 0.24        | 10.0       | C <sub>23</sub> H <sub>33</sub> O <sub>4</sub> N <sub>5</sub> <sup>54</sup> Fe |
|          | 497.1942   | -2.46       | 9.5        | C <sub>25</sub> H <sub>35</sub> O <sub>5</sub> N <sub>2</sub> <sup>54</sup> Fe |
|          | 497.1951   | -4.19       | 18.0       | C <sub>29</sub> H <sub>27</sub> O <sub>5</sub> N <sub>3</sub>                  |
|          | 497.1905   | 4.93        | 26.5       | C <sub>38</sub> H <sub>25</sub> O                                              |

**Figure S5.** HR-MS data report of Fc-DEAE-AM 3 monomer.

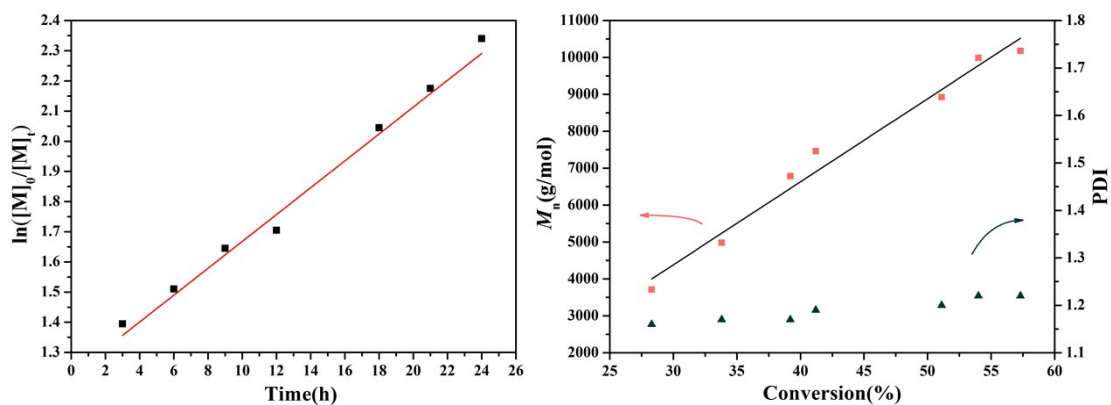

**Figure S6.** (A) Kinetics plot for solution RAFT homopolymerization of Fc-DEAE-AM **3** monomer. (B) Dependence of molecular weight ( $M_n$ ) and molecular weight distribution (PDI) on the conversion of Fc-DEAE-AM **3** monomer.

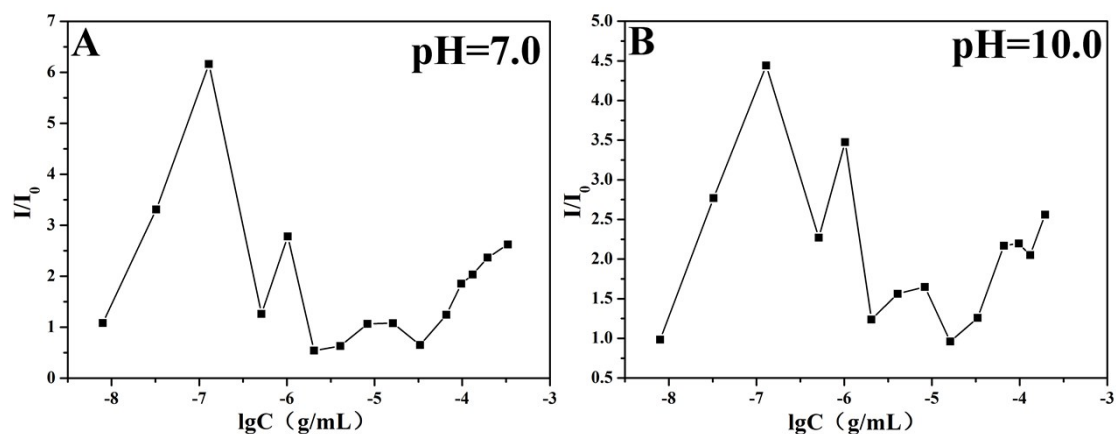

**Figure S7.** Dependence of fluorescence intensity ratio of PNA emission band at 418 nm on the concentration of poly(Fc-DEAE-AM) **4a** at 25°C when pH of the solution was (A) 7.0 and (B) 10.0.
